# Supplementary material for: SMAD4 Loss triggers the phenotypic changes of pancreatic ductal adenocarcinoma cells
Source: PubMed Central journal article supplement (PMC4007528; doi:10.1186/1471-2407-14-181), 2014-03-14

**AsPC-1**

**PANC-1**

puro

SMAD4

pLKO.1

shSMAD4

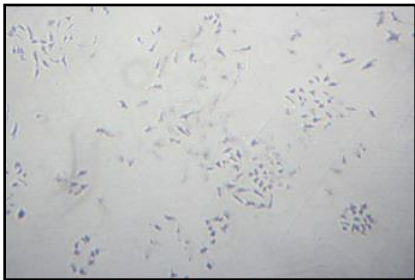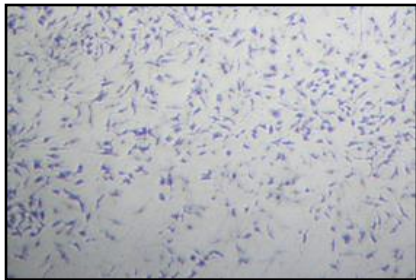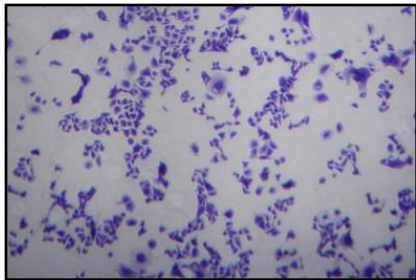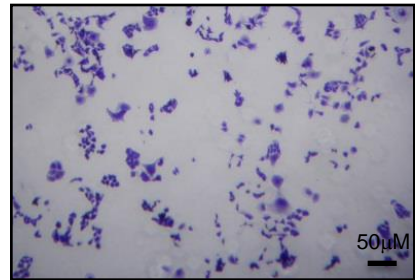

Supplement: 1471-2407-14-181-S1.pdf [file 1471-2407-14-181-S1.pdf]
