# Supplementary material for: SMAD4 Loss triggers the phenotypic changes of pancreatic ductal adenocarcinoma cells
Source: PubMed Central journal article supplement (PMC4007528; doi:10.1186/1471-2407-14-181), 2014-03-14

# Supplementary Figure 3

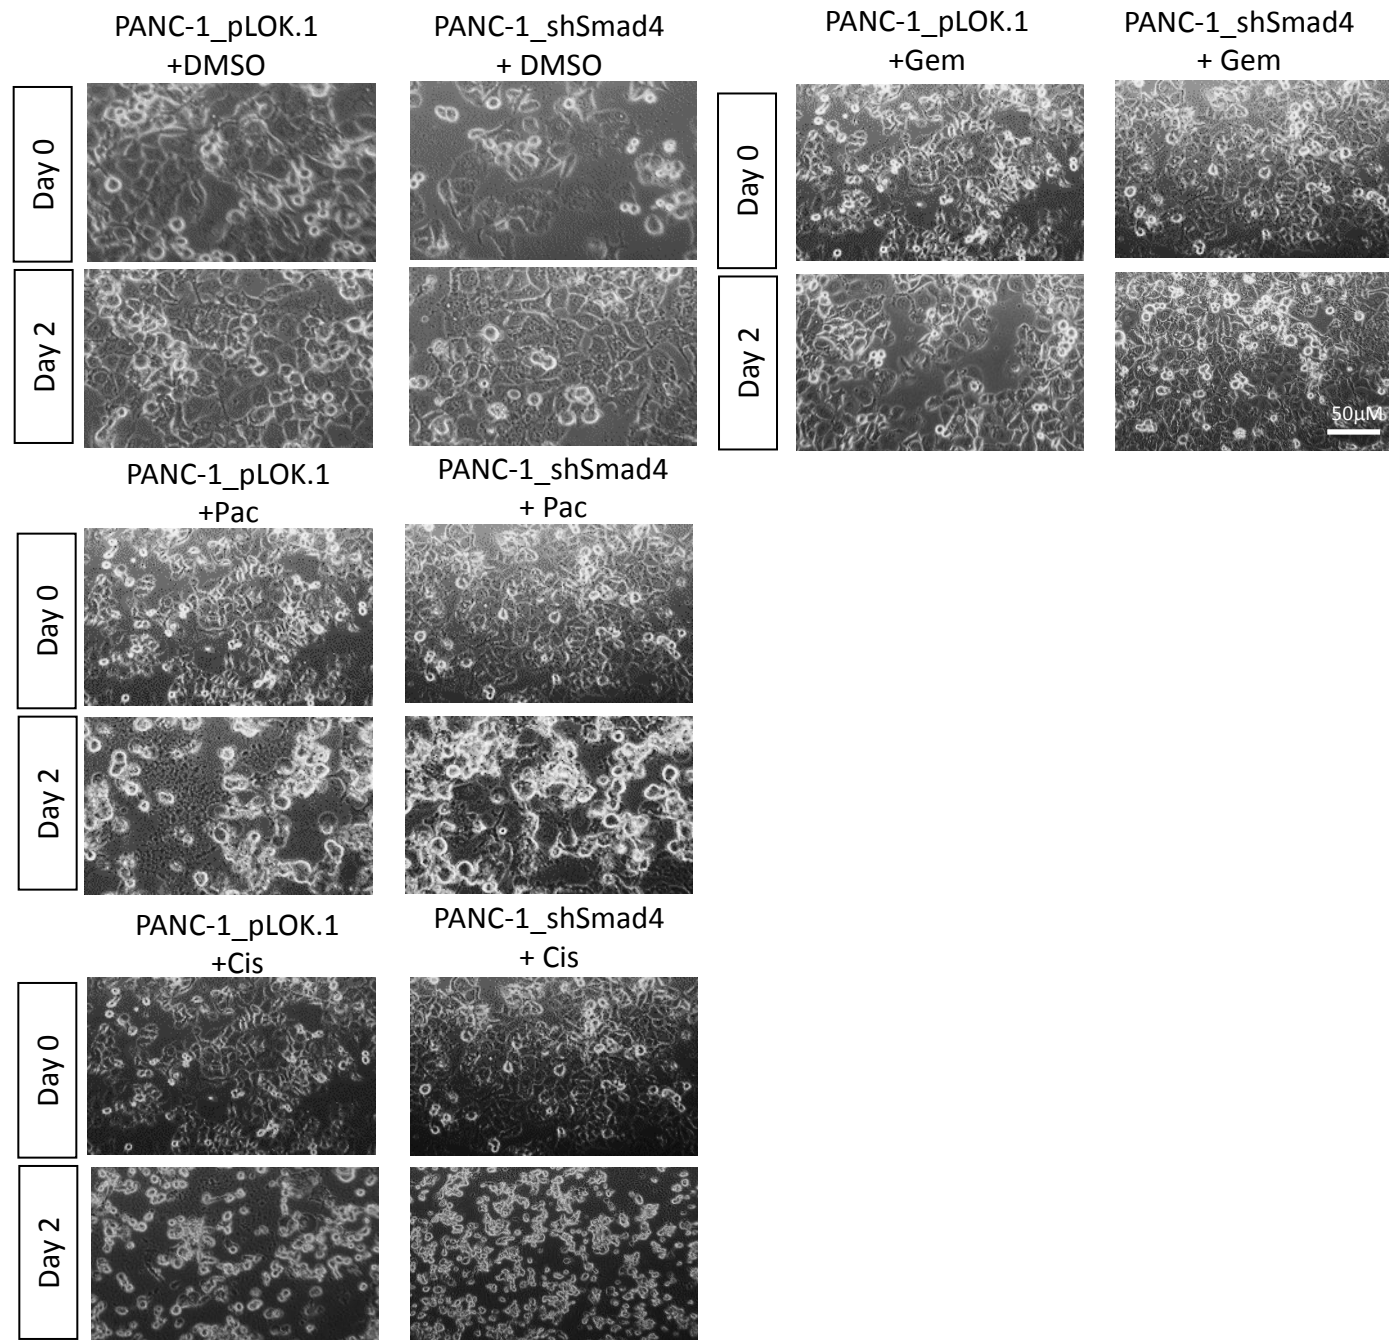

Supplement: 1471-2407-14-181-S3.pdf [file 1471-2407-14-181-S3.pdf]
